# Supplementary material for: Mental Health, Substance Use, and Socioeconomic Needs of Older Persons Paroled or Placed on Probation
Source: Atypon-hosted journal article supplement (doi:10.1176/appi.ps.201600492), 2017-06-01
Supplement: appi.ps.201600492.ds001.pdf [file appi.ps.201600492.ds001.pdf]

## Online Supplement

| <b>Online Supplemental Table. Characteristics of older (age ≥50) respondents to the 2005-2014 National Survey for Drug Use and Health questionnaires, stratified by parole and probation status.</b> |                                                           |                                                 |
|------------------------------------------------------------------------------------------------------------------------------------------------------------------------------------------------------|-----------------------------------------------------------|-------------------------------------------------|
| <b>Characteristic</b>                                                                                                                                                                                | <b>Any community correctional supervision<sup>a</sup></b> | <b>Neither parole nor probation<sup>a</sup></b> |
| Unweighted sample size (N)                                                                                                                                                                           | 499                                                       | 60,561                                          |
| <i>Demographic variables (%)</i>                                                                                                                                                                     |                                                           |                                                 |
| Age 65+ years old                                                                                                                                                                                    | 17.3**                                                    | 41.1**                                          |
| Female                                                                                                                                                                                               | 26.5**                                                    | 53.8**                                          |
| Black                                                                                                                                                                                                | 20.5**                                                    | 9.8**                                           |
| Hispanic                                                                                                                                                                                             | 11.6                                                      | 8.6                                             |
| Did not graduate high school                                                                                                                                                                         | 28.7**                                                    | 15.8**                                          |
| <i>Past-year socioeconomic variables (%)</i>                                                                                                                                                         |                                                           |                                                 |
| Impoverished                                                                                                                                                                                         | 25.6**                                                    | 8.3**                                           |
| Any health insurance                                                                                                                                                                                 | 77.9**                                                    | 93.1**                                          |
| Any government assistance                                                                                                                                                                            | 34.9**                                                    | 14.4**                                          |
| <i>Past-year mental health variables (%)</i>                                                                                                                                                         |                                                           |                                                 |
| Major depressive episode <sup>b</sup>                                                                                                                                                                | 15.6**                                                    | 5.0**                                           |
| Serious psychological distress <sup>c</sup>                                                                                                                                                          | 22.6**                                                    | 6.3**                                           |
| Any outpatient mental health treatment <sup>d</sup>                                                                                                                                                  | 19.9**                                                    | 5.8**                                           |
| Any mental health prescriptions <sup>e</sup>                                                                                                                                                         | 28.1**                                                    | 12.0**                                          |
| <i>Past-year substance use variables (%)</i>                                                                                                                                                         |                                                           |                                                 |
| Alcohol abuse or dependence <sup>f</sup>                                                                                                                                                             | 20.6**                                                    | 3.2**                                           |
| Drug abuse or dependence <sup>f</sup>                                                                                                                                                                | 7.4**                                                     | .6**                                            |
| Specialized substance use treatment <sup>g</sup>                                                                                                                                                     | 14.3**                                                    | .4**                                            |
| <i>General health variables (%)</i>                                                                                                                                                                  |                                                           |                                                 |
| Self-rated health fair/poor                                                                                                                                                                          | 35.1**                                                    | 20.0**                                          |
| ** p < 0.001                                                                                                                                                                                         |                                                           |                                                 |
| <sup>a</sup> Chi-squared tests with second-order Rao-Scott correction tested for differences between the groups.                                                                                     |                                                           |                                                 |
| <sup>b</sup> Major depressive episodes derived from the National Comorbidity Survey - Replication, which is based upon DSM-IV diagnostic criteria.                                                   |                                                           |                                                 |

<sup>c</sup> Serious psychological distress was defined as a score of  $\geq 13$  on the Kessler 6 scale.

<sup>d</sup> Outpatient mental health treatment was “any outpatient treatment or counseling for any problem you were having with your emotions, nerves, or mental health.”

<sup>e</sup> Mental health prescriptions were “any prescription medication that was prescribed for you to treat a mental or emotional condition.”

<sup>f</sup> Substance abuse and dependence were based upon DSM-IV diagnostic criteria.

<sup>g</sup> Specialized substance use treatment referred to services delivered in specialized treatment facilities (hospitals, rehab centers, methadone clinics, mental health clinics).
